# Supplementary material for: Alternative splicing of human NT5E in cirrhosis and hepatocellular carcinoma produces a negative regulator of ecto-5′-nucleotidase (CD73)
Source: PubMed Central journal article supplement — Mol Biol Cell. 2014 Dec 15;25(25):4024–33. doi: 10.1091/mbc.E14-06-1167 (PMC4263446; doi:10.1091/mbc.e14-06-1167), 2014-12-15
Supplement: supp_E14-06-1167v1_CombinedSupMats.pdf [file supp_E14-06-1167v1_CombinedSupMats.pdf]

# Supplemental Materials

*Molecular Biology of the Cell*

Snider et al.

**Supplemental Figure 1.** Immunoblotting and Coomassie stain of human liver lysates (2 normal and 2 HCC tumors) with serum from a rabbit prior to immunization with CD73S immunogenic peptide.

**Supplemental Figure 2. A.** Co-immunofluorescence analysis of Flag-CD73S (green) and the ER-marker protein PDI (red) in HEK293T cells. **B.** Flag immunoblot of lysates from HEK-293T cells transfected with cDNA encoding Flag-CD73L in combination with Flag-CD73S (lane 1) or mouse Flag-GAPDH (lanes 2-4). The amount of CD73L cDNA transfected was equal among all 4 lanes and GAPDH cDNA was in 2-fold excess of CD73L cDNA. **C.** CD73S/L immunoblot (N-terminus antibody) of transfected HEK293T lysates [Flag-CD73 (2 $\mu$ g), GFP-CD73L (2 $\mu$ g) or a combination of the two (1 $\mu$ g each)] showing that CD73S negatively regulates CD73L. **D.** Expression of Flag-CD73S and Flag-cN-IA individually (lanes 1, 2) or in combination (equal cDNA amount) demonstrating that CD73S downregulates cN-IA protein expression.

**Supplemental Table 1. Primers used for quantitative real-time PCR**

|                         |                          |
|-------------------------|--------------------------|
| Human NT5E-1 Forward:   | CTCCTCTCAATCATGCCGCT     |
| Human NT5E-1 Reverse:   | CAAATGTGCCTCCAAAGGGC     |
| Human NT5E-2 Forward:   | TGATGAACGCAACAATGGAATC   |
| Human NT5E-2 Reverse:   | TCTGGAACCCATCTCCACCA     |
| Human 18S Forward:      | CCATCCAATCGGTAGTAGCG     |
| Human 18S Reverse:      | GTAACCCGTTGAACCCATT      |
| Mouse AK047143 Forward: | CCATGTGCATTGTAAACGGAGGTG |
| Mouse AK047143 Reverse: | TTTGGTTTGTGGTTGGCAGCAGAG |
| Mouse 18S Forward:      | ACCTGGTTGATCCTGCCAGTAG   |
| Mouse 18S Reverse:      | TTAATGAGCCATTTCGCAGTTTC  |

**Supplemental Table 2. Clinical Description of surgical and biopsy human liver specimens used in the present study.**

| <b>HCC surgical specimens</b>         |                                   |                       |                  |                 |                          |
|---------------------------------------|-----------------------------------|-----------------------|------------------|-----------------|--------------------------|
| <b>Sample</b>                         | <b>Lab Info</b>                   | <b>Etiology</b>       | <b>Max Tumor</b> | <b># tumors</b> | <b>surrounding liver</b> |
| HCC #1                                | Tumor (large, white+brown, soft)  | none                  | 8.6 cm           | 1               | normal                   |
| HCC #2                                | Tumor (med-large pieces, T2-pink) | HCV                   | 5.2 cm           | 2               | fibrosis                 |
| HCC #3                                | Tumor (small, soft)               | HCV                   | 2.2 cm           | 1               | cirrhosis                |
| HCC #4                                | Tumor (huge, white+pink, soft)    | none                  | 23 cm            | numerous        | normal                   |
| HCC #5                                | Tumor (huge, white+yellow, soft)  | none                  | 8.5 cm           | 1               | normal                   |
| HCC #6                                | Tumor (Medium, white, soft)       | alcohol               | 4.4 cm           | 1               | fibrosis                 |
| <b>HCV cirrhosis biopsy specimens</b> |                                   |                       |                  |                 |                          |
| <b>Sample</b>                         | <b>Confirmed Pathology</b>        | <b>Fibrosis Score</b> | <b>AFP level</b> |                 |                          |
| HCV #1                                | Hepatitis C                       | 6                     | 3                |                 |                          |
| HCV #2                                | Hepatitis C                       | 6                     | 44.2             |                 |                          |
| HCV #3                                | Hepatitis C                       | 6                     | 9.1              |                 |                          |
| HCV #4                                | Hepatitis C                       | 6                     | 7.7              |                 |                          |

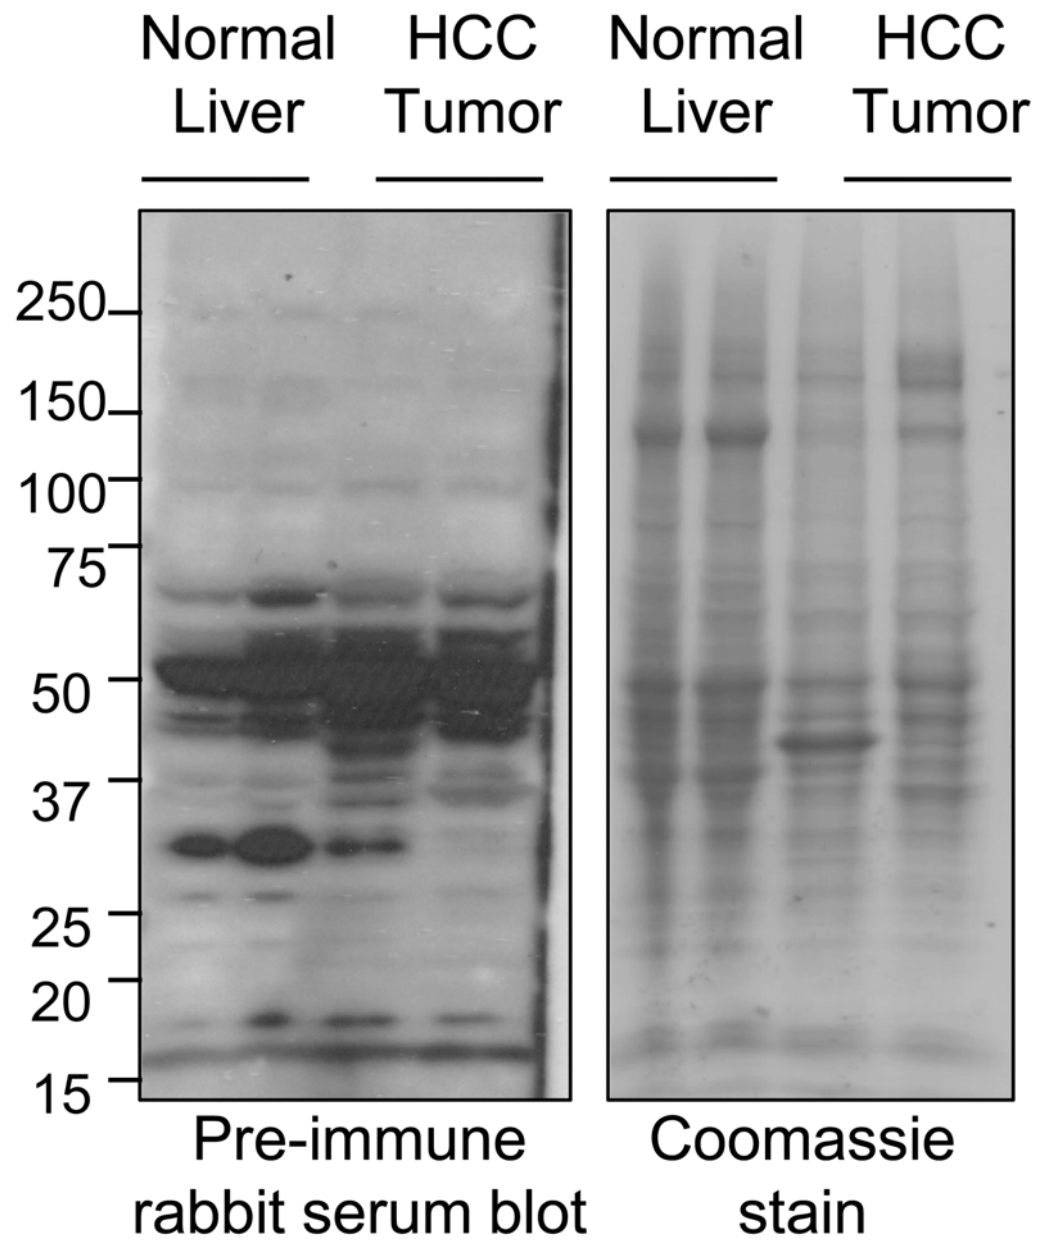

**Supplemental Figure 1**

**A**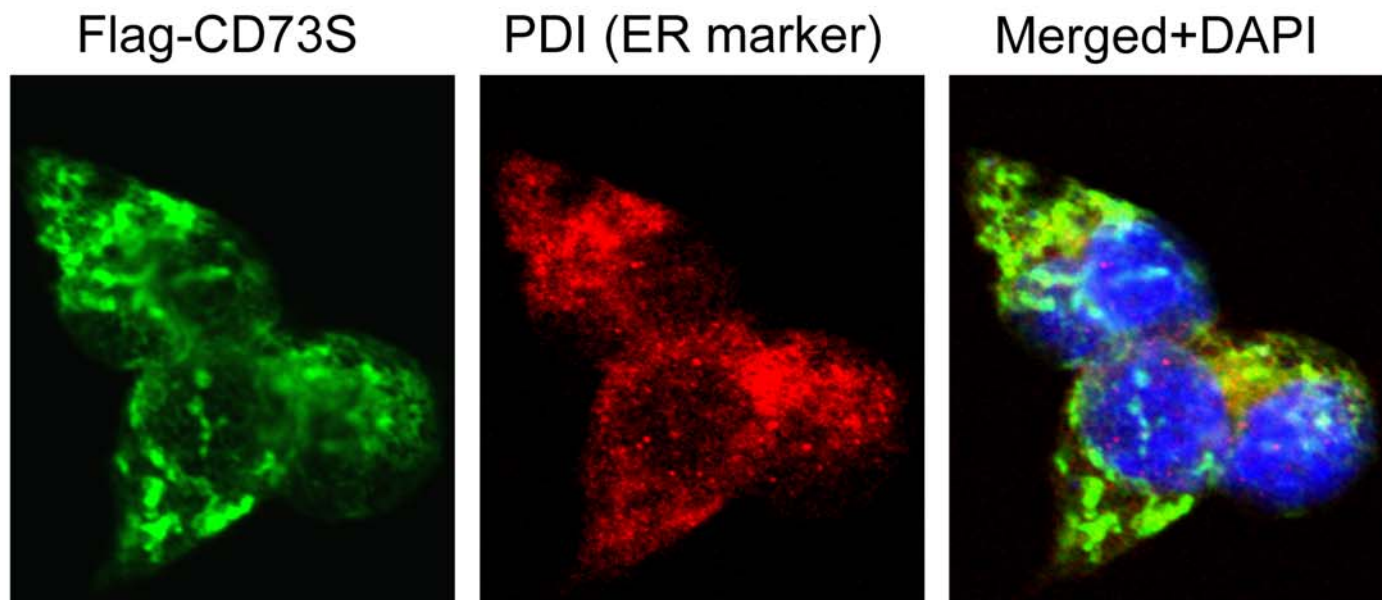**B**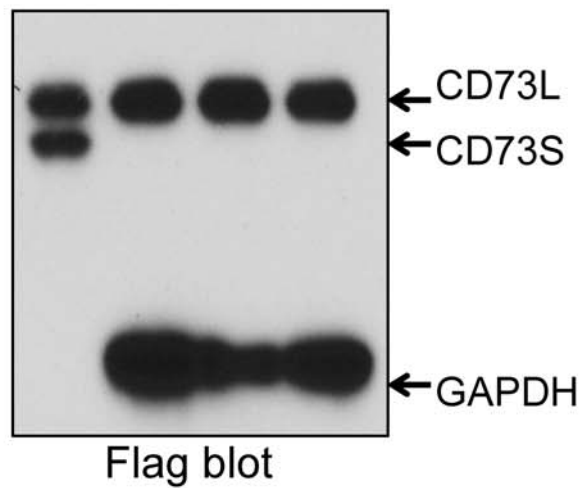**C**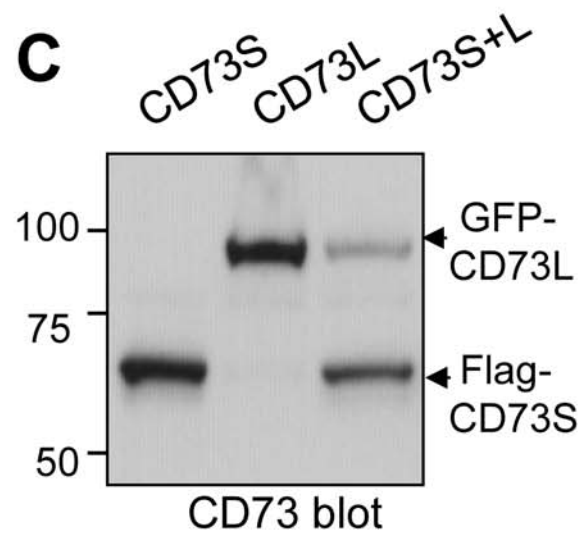**D**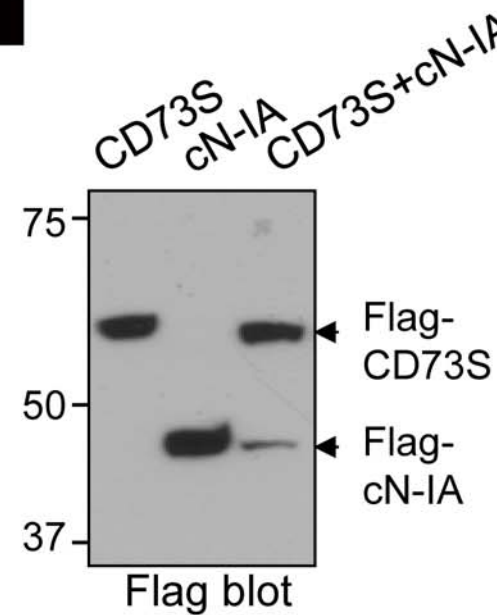

Supplemental Figure 2
